# Supplementary material for: Effects of Nitrogen Availability on the Antioxidant Activity and Carotenoid Content of the Microalgae Nephroselmis sp
Source: PubMed Central journal article supplement (PMC7551860; doi:10.3390/md18090453), 2020-08-29
Supplement: marinedrugs-18-00453-s001.pdf [file marinedrugs-18-00453-s001.pdf]

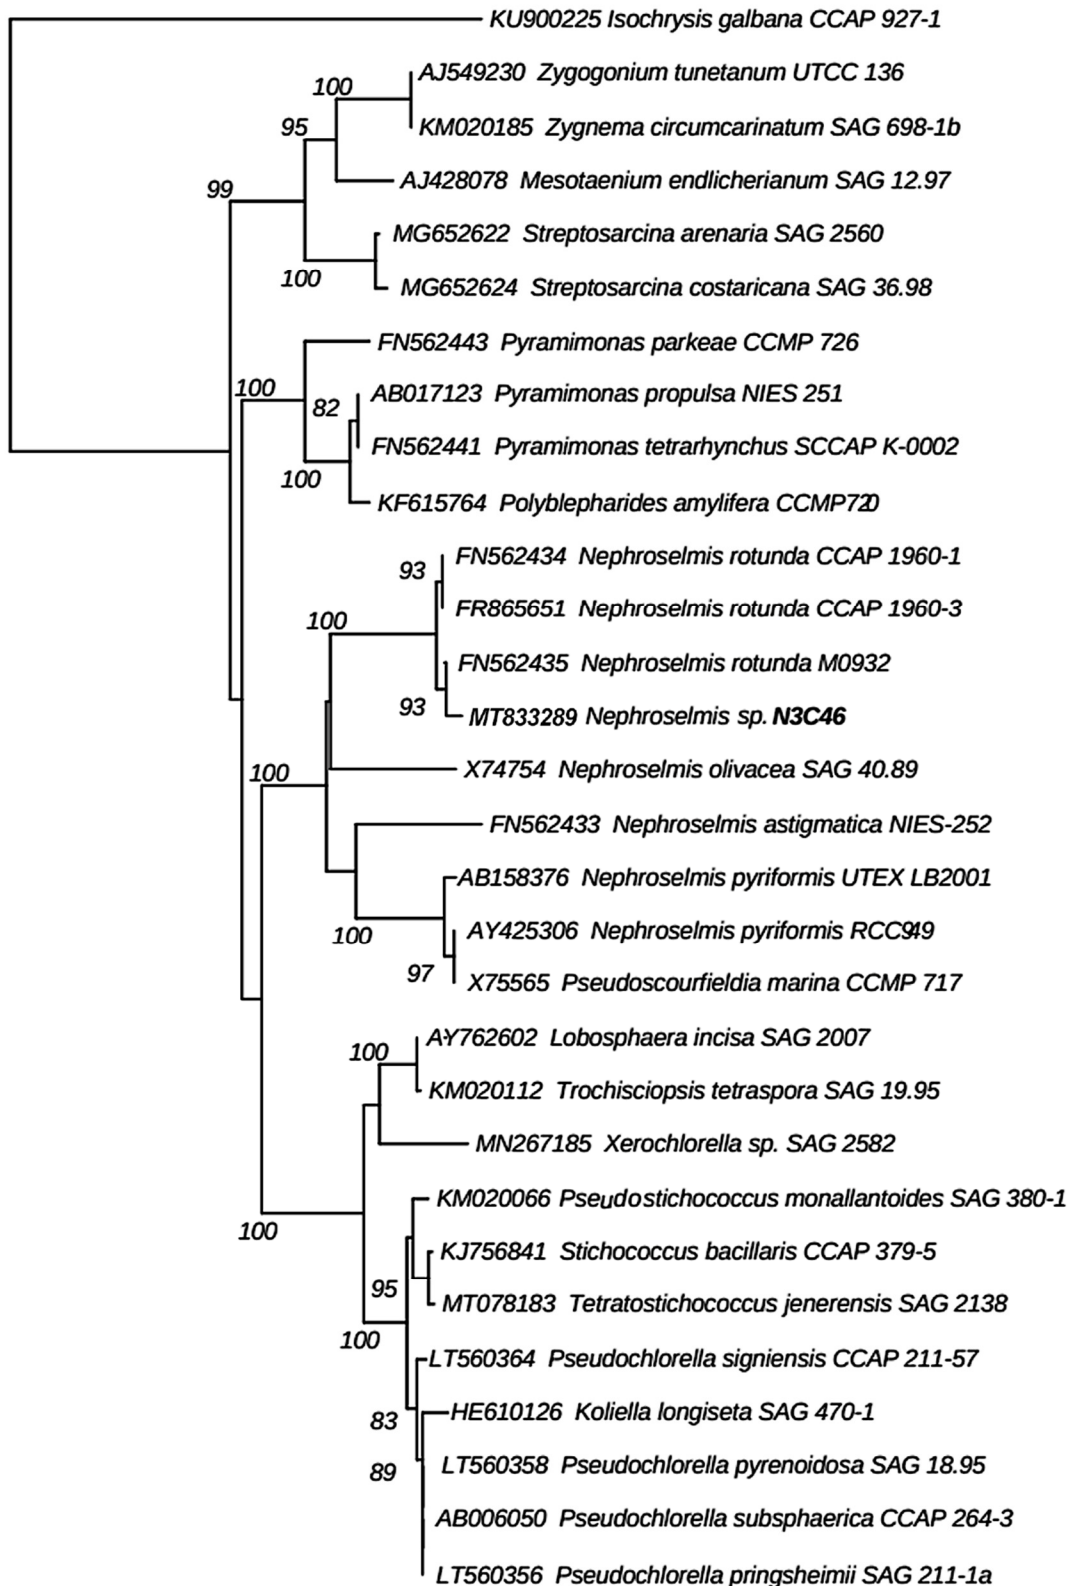

**Figure S1.** Phylogenetic tree of *Nephroselmis* sp. N3C46 based on 18S rRNA sequences

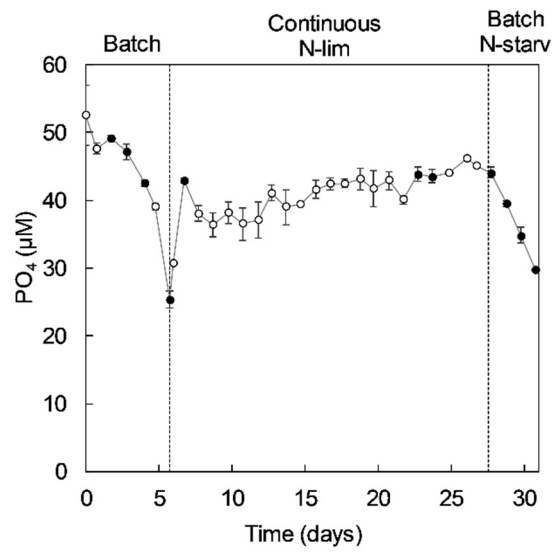

**Figure S2.** Residual phosphate concentration ( $\mu\text{M}$ ) in the medium over time of *Nephroselmis* sp. cultures in PBRs in batch and continuous mode. Black dots represent sample collection for antioxidant activity measure and carotenoids analysis. Data are expressed as mean  $\pm$  standard error (SE, n = 2).

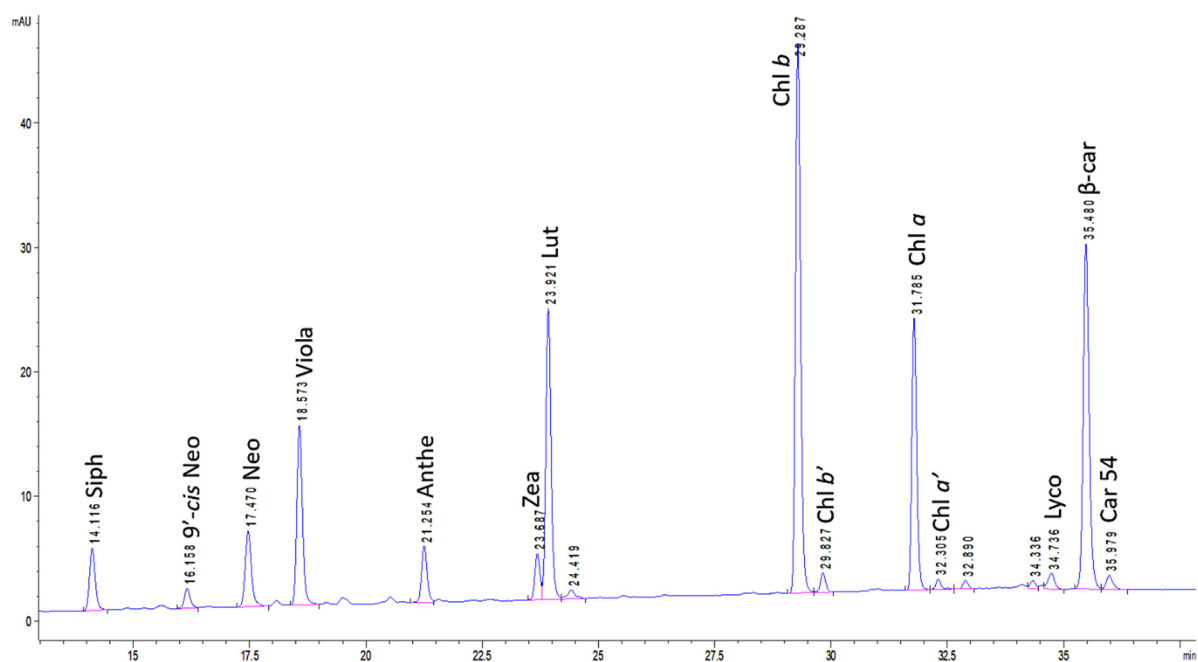

**Figure S3.** HPLC chromatogram at 450 nm of ethanol extract of *Nephroselmis* sp.. Siph, siphonaxanthin; Neo, neoxanthin; Viola, violaxanthin; Anthe, antheraxanthin; Zea, zeaxanthin; Lut, lutein; Chl, chlorophyll; Lyco, lycopene;  $\beta$ -car,  $\beta$ -carotene; Car 54, unidentified carotenoid (see Serive et al. [103] for UV-vis spectrum of Car 54 in HPLC system)

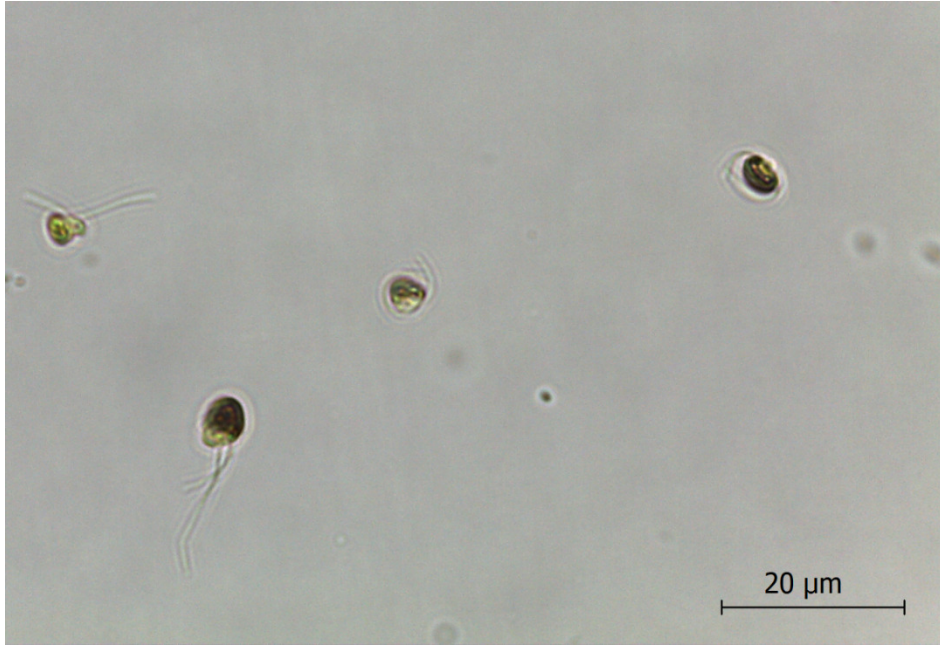

**Figure S4.** Microphotography of *Nephroselmis* sp.

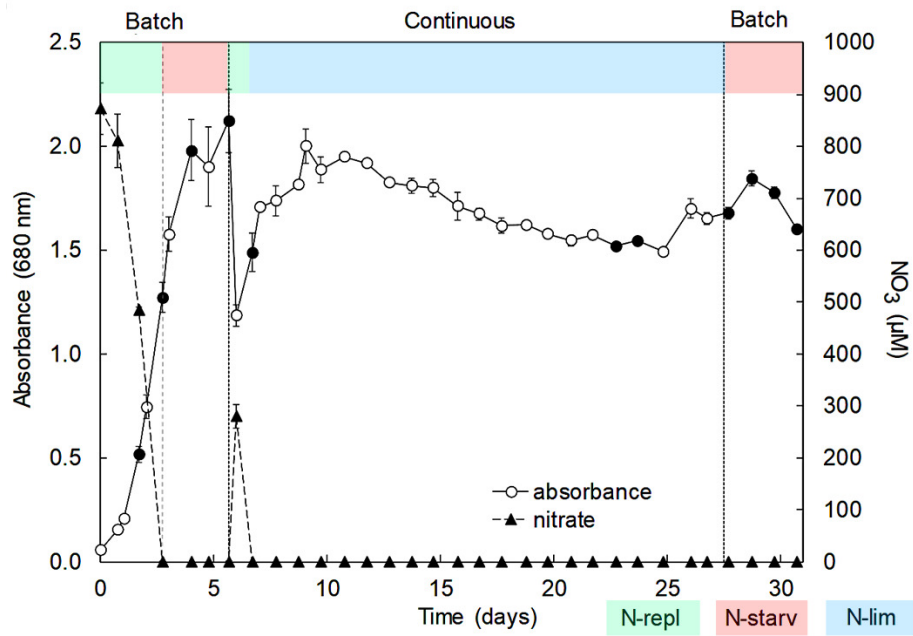

**Figure S5.** Absorbance at 680 nm and residual nitrate concentration ( $\mu\text{M}$ ) over time of *Nephroselmis* sp. cultures in PBRs in batch and continuous mode. Black dots represent sample collection for antioxidant activity and carotenoids analysis. Data are expressed as mean  $\pm$  standard error (SE,  $n = 2$ ).

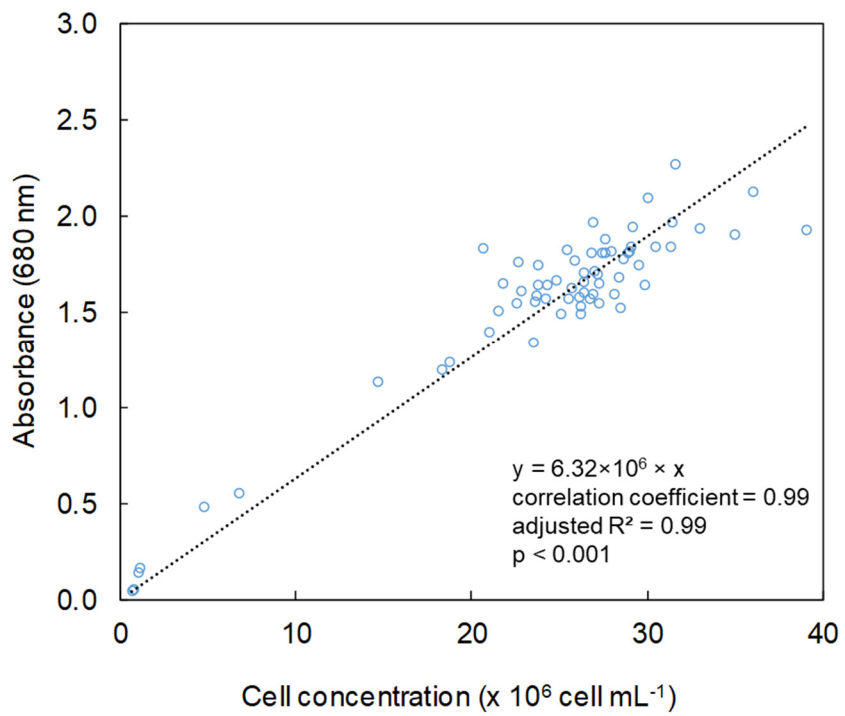

**Figure S6.** Pearson's correlation analysis between cell concentration in cell mL<sup>-1</sup> and light absorbance at 680 nm

**Table S1.** Pigment composition of *Nephroselmis* sp. (mg g<sup>-1</sup> DW) at different time of the culture. Siph, siphonaxanthin; Neo, neoxanthin (*trans* and *cis*); XCP, Xanthophyll Cycle Pigments (violaxanthin + antheraxanthin + zeaxanthin); Lut, lutein; Lyco, lycopene; β-Car, β-carotene; TC, total carotenoids; Chl *a*, chlorophyll *a*; Chl *b*, chlorophyll *b*. Data are expressed as mean ± standard error (SE, n = 2). Different letters indicate statistically significant differences (p<0.05).

|                           |                        | Siph                      | Neo                        | XCP                       | Lut                        | Lyco                       | β-car                       | TC                         | Chl <i>a</i>               | Chl <i>b</i>               |
|---------------------------|------------------------|---------------------------|----------------------------|---------------------------|----------------------------|----------------------------|-----------------------------|----------------------------|----------------------------|----------------------------|
| <b>Batch</b>              | Day 2                  | 5.00 ± 0.80 <sup>b</sup>  | 7.35 ± 1.47 <sup>b</sup>   | 9.50 ± 0.44 <sup>b</sup>  | 5.93 ± 0.10 <sup>bc</sup>  | 2.93 ± 0.12 <sup>abc</sup> | 11.84 ± 0.73 <sup>ab</sup>  | 42.55 ± 2.99 <sup>b</sup>  | 73.75 ± 11.24 <sup>b</sup> | 79.48 ± 6.40 <sup>b</sup>  |
|                           | Day 3                  | 6.36 ± 0.33 <sup>a</sup>  | 9.58 ± 0.75 <sup>a</sup>   | 12.14 ± 0.35 <sup>a</sup> | 7.16 ± 0.06 <sup>ab</sup>  | 3.32 ± 0.37 <sup>a</sup>   | 12.14 ± 0.55 <sup>ab</sup>  | 50.70 ± 1.34 <sup>a</sup>  | 110.15 ± 3.79 <sup>a</sup> | 102.97 ± 0.51 <sup>a</sup> |
|                           | Day 4                  | 4.07 ± 0.32 <sup>b</sup>  | 6.08 ± 0.61 <sup>b</sup>   | 9.57 ± 0.36 <sup>b</sup>  | 7.13 ± 0.21 <sup>ab</sup>  | 2.99 ± 0.34 <sup>ab</sup>  | 11.71 ± 0.65 <sup>ab</sup>  | 41.55 ± 1.64 <sup>b</sup>  | 65.57 ± 2.81 <sup>bc</sup> | 64.21 ± 3.30 <sup>c</sup>  |
|                           | Day 6                  | 2.35 ± 0.22 <sup>cd</sup> | 4.04 ± 0.34 <sup>c</sup>   | 7.43 ± 0.19 <sup>cd</sup> | 6.82 ± 0.24 <sup>abc</sup> | 2.48 ± 0.02 <sup>bcd</sup> | 10.63 ± 0.40 <sup>bc</sup>  | 33.74 ± 1.30 <sup>c</sup>  | 41.67 ± 2.18 <sup>de</sup> | 44.20 ± 2.02 <sup>d</sup>  |
| <b>Continuous N-lim</b>   | N-resupply Day 7       | 4.01 ± 0.53 <sup>b</sup>  | 6.05 ± 1.12 <sup>b</sup>   | 8.60 ± 0.64 <sup>bc</sup> | 7.97 ± 0.84 <sup>a</sup>   | 2.89 ± 0.17 <sup>abc</sup> | 12.89 ± 1.43 <sup>a</sup>   | 42.40 ± 4.06 <sup>b</sup>  | 66.10 ± 5.93 <sup>b</sup>  | 63.94 ± 6.83 <sup>c</sup>  |
|                           | Steady state Day 23-24 | 2.66 ± 0.24 <sup>c</sup>  | 3.37 ± 0.47 <sup>cd</sup>  | 8.08 ± 0.75 <sup>bc</sup> | 5.64 ± 0.54 <sup>bc</sup>  | 2.58 ± 0.28 <sup>bc</sup>  | 8.86 ± 0.74 <sup>c</sup>    | 31.20 ± 2.63 <sup>cd</sup> | 51.82 ± 5.43 <sup>cd</sup> | 45.92 ± 3.87 <sup>d</sup>  |
| <b>Batch N-starvation</b> | Day 28                 | 2.33 ± 0.07 <sup>cd</sup> | 2.94 ± 0.00 <sup>cde</sup> | 7.63 ± 0.29 <sup>cd</sup> | 5.92 ± 0.36 <sup>bc</sup>  | 2.70 ± 0.09 <sup>abc</sup> | 9.24 ± 0.59 <sup>c</sup>    | 30.76 ± 0.05 <sup>cd</sup> | 45.66 ± 2.36 <sup>d</sup>  | 41.58 ± 2.79 <sup>de</sup> |
|                           | Day 29                 | 1.32 ± 0.12 <sup>de</sup> | 2.09 ± 0.06 <sup>de</sup>  | 6.08 ± 0.52 <sup>de</sup> | 5.33 ± 0.47 <sup>c</sup>   | 2.26 ± 0.01 <sup>cd</sup>  | 9.42 ± 0.54 <sup>c</sup>    | 26.51 ± 0.59 <sup>d</sup>  | 29.61 ± 2.08 <sup>ef</sup> | 30.05 ± 2.20 <sup>ef</sup> |
|                           | Day 30                 | 1.05 ± 0.16 <sup>e</sup>  | 1.94 ± 0.15 <sup>e</sup>   | 5.84 ± 0.77 <sup>de</sup> | 5.56 ± 0.85 <sup>bc</sup>  | 1.85 ± 0.23 <sup>d</sup>   | 10.61 ± 0.14 <sup>bc</sup>  | 26.84 ± 2.26 <sup>cd</sup> | 24.25 ± 2.70 <sup>f</sup>  | 28.07 ± 2.92 <sup>f</sup>  |
|                           | Day 31                 | 0.74 ± 0.12 <sup>e</sup>  | 1.72 ± 0.25 <sup>e</sup>   | 5.24 ± 0.88 <sup>e</sup>  | 5.22 ± 1.00 <sup>c</sup>   | 0.95 ± 0.16 <sup>e</sup>   | 10.85 ± 0.44 <sup>abc</sup> | 24.72 ± 2.78 <sup>d</sup>  | 20.69 ± 2.93 <sup>f</sup>  | 26.03 ± 2.87 <sup>f</sup>  |
